# Supplementary material for: OLIGOCELLULA1/HIGH EXPRESSION OF OSMOTICALLY RESPONSIVE GENES15 Promotes Cell Proliferation With HISTONE DEACETYLASE9 and POWERDRESS During Leaf Development in Arabidopsis thaliana
Source: Front Plant Sci. 2018 May 3;9:580. doi: 10.3389/fpls.2018.00580 (PMC5943563; doi:10.3389/fpls.2018.00580)
Supplement: Supplementary file 1 [file Table_1.XLSX]

## Sheet: Sheet1
	Supplementary Table S1. Oligonucleotides used in this study.
	Oligonucleotide sequences	Use
	CTCAGTCAAACTCGAAGTG	Genotyping (Salk_002912)
	TGACACGGATTCGTTGAGGT	Genotyping (Salk_002912)
	CCTGACTATGTAGAGTTCCTGC	Genotyping (Salk_007123/hda9-1)
	TTCCTAGCACGAGATCGTTG	Genotyping (Salk_007123/hda9-1)
	ATCCACTTGAACCGCACTAG	Genotyping (GABI_305G03/hda9-2)
	CACAGGTACTAGAGTCGTCTTC	Genotyping (GABI_305G03/hda9-2)
	CGGAAGATTGAGGTTCTTCC	Genotyping (Salk_071811/pwr-2)
	TACGAGTGAGTTACACTGTCCC	Genotyping (Salk_071811/pwr-2)
	TAGTTTCATTGCAAGAGGAC	Genotyping (Salk_006823/pwr-10)
	CCTGCTTACCATGACCTTCAG	Genotyping (Salk_006823/pwr-10)
	GAGAGACAGAGAGAGATAAGG	Genotyping (Salk_004679)
	GAGATTAGAGATCGAACAGA	Genotyping (Salk_004679)
	TATATGTTTGAAGCTAAGGAAGCTTCATCTTATTCTT	Construction of pCYCB1;1::GUS vector
	GGGACTGACCTACCCTATCAACAATCTTTTCTTTC	Construction of pCYCB1;1::GUS vector
	CCCGGGTTTACACACGCTGCATT	Construction of HOS15 RNAi vector
	AAGCTTCTCGTGCCTATCCTTTT	Construction of HOS15 RNAi vector
	GAGCTCAGGGTTTACACACGCTGCA	Construction of HOS15 RNAi vector
	GCTTCTCGTGCCTATCCTTTT	Construction of HOS15 RNAi vector
	ATAGAAAAGTTGATTCTGGAGAGTAGTCAAAAAAATACC	Cloning of pHOS15
	TGTACAAACTTGCTCCACAGCCAAATCCTAAC	Cloning of pHOS15
	AAAAAGCAGGCTATGTTACGTCCTGTAGAAACC	Cloning of uidA cDNA
	AGAAAGCTGGGTCATTGTTTGCCTCCCTGCT	Cloning of uidA cDNA
	CACCGTGTAGACGAACCAAAAGATCTACG	Cloning of PWR genomic fragment from promoter to the last codon
	GCGCCCACCCTTTTTCGTGGCTGCCTCTGCTACAC	Cloning of PWR genomic fragment from promoter to the last codon
	TATATGTTTGAAGCTGGTCATCATTTCTCTCAACA	Cloning of HDA9 promoter plus transcribed region
	ACAACGATAACGATGCGTCACCCGGGAATTCACTGGCCGTC	Cloning of HDA9 promoter plus transcribed region
	AACGATGCGTCAcccgggggcggtggaggcATGGTGAGCAAGGGCGAGGA	Cloning of Venus cDNA
	TTACTTGTACAGCTCGTCCA	Cloning of Venus cDNA
	GAGCTGTACAAGTAAAACATCGATTCTTAGAAATTGTTGG	Cloning of HDA9 3' reguion downstream of the termination codon
	GGCCAGTGAATTCCCGACTTGGAACTTATTTACGACTC	Cloning of HDA9 3' reguion downstream of the termination codon
	CACCATGTCTTCACTTACCTCCGT	Cloning of HOS15 cDNA
	CTACATTCTGAAATCAAGAACGC	Cloning of HOS15 cDNA
	CATTCTGAAATCAAGAACGCAAAC	Cloning of termination codon-less HOS15 cDNA
	CACCATGCCGCAGGATCACGCTTC	Cloning of PWR cDNA, RT-PCR
	TCACGTGGCTGCCTCTGCTA	Cloning of PWR cDNA
	CGTGGCTGCCTCTGCTACAC	Cloning of termination codon-less PWR cDNA
	CACCATGCGTTCCAAGGACAA	Cloning of HDA9 cDNA
	TTATGACGCATCGTTATCGTTGTC	Cloning of HDA9 cDNA
	TGACGCATCGTTATCGTTGTC	Cloning of termination codon-less HAD9 cDNA
	TTCATATCCAAGGCGGTCAATGTGG	RT-PCR (TUB4)
	CGAGCTTGAGGGTACGGAAACAG	RT-PCR (TUB4)
	AGGAAGATATACTGCCCATA	RT-PCR (PWR)
	GGAGTAAAATTTTCTCCCTAGCTC	RT-PCR (PWR)
	AAGAAGGTCTGCGGAAGTCT	RT-PCR (PWR)
	ATGTCTTCACTTACCTCCGT	RT-PCR (HOS15)
	CTACATTCTGAAATCAAGAACGC	RT-PCR (HOS15)
	TGGTGGAGGGTATACTATTC	RT-PCR (HDA6)
	TGCGAGGTTTTGGTCTTGTC	RT-PCR (HDA6)
	ATGCGTTCCAAGGACAA	RT-PCR (HDA9)
	TTATGACGCATCGTTATCGTTGTC	RT-PCR (HDA9)
	TCGGTGGTTCCATTCTTGCT	RT-qPCR (ACT2)
	GCTTTTTAAGCCTTTGATCTTGAGAG	RT-qPCR (ACT2)
	TTTGTGCTTGCGCATGGA	RT-qPCR (HOS15)
	ATTCGCGCTGTTGCATCA	RT-qPCR (HOS15)
	CTCCACCGCCACATGGA	RT-qPCR (HDA7)
	GAATTTTTCGAAATCGGAAGCA	RT-qPCR (HDA7)
	CGATTGTACTGAGCCTGCACTT	RT-qPCR (At5g60610)
	CGACGAAATCTGAGGTACAAGCT	RT-qPCR (At5g60610)
	TTGCAGATTGCCTCAGAGCTT	RT-qPCR (At5g56370)
	CATCCTTGAGCGATACGTTTTTT	RT-qPCR (At5g56370)
	GGGATTCAAGCTGAAGCTATGAG	RT-qPCR (At4g22390)
	GCCACTGCTACTGTTACTGTACCTTAA	RT-qPCR (At4g22390)
	CCAATAAGGTGATGGATACATTTCAA	RT-qPCR (At2g45135)
	GACGCCTGAAGATCCTTCGA	RT-qPCR (At2g45135)
	GCTTGTTTAACCTAAAAGCCTCAGAT	RT-qPCR (MIR156C)
	CAAATTCTGAGATTAGAGATCGAACAGA	RT-qPCR (MIR156C)
	TTGGCGAAGTTTCCATTTAGAGT	RT-qPCR (DAR3)
	AATTCACTTCTCCACCGTTCAAA	RT-qPCR (DAR3)
	CGCATCGACTCACCTATTTGC	RT-qPCR (CYP78A7)
	CCATTTCAGCGCAGTCTAGCT	RT-qPCR (CYP78A7)
